# Supplementary material for: The Prevalence and Incidence of Latent Tuberculosis Infection and Its Associated Factors among Village Doctors in China
Source: PubMed Central journal article supplement (PMC4440671; doi:10.1371/journal.pone.0124097), 2015-05-21
Supplement: pone.0124097.s002.pdf [file pone.0124097.s002.pdf]

伦理委员会  
 研究方案审核表

编号:

|               |                                                                          |       |                |
|---------------|--------------------------------------------------------------------------|-------|----------------|
| 研究题目          | 中美结核感染控制合作项目—继续加强区人员结核感染控制调查                                             |       |                |
| 研究单位          | 中国疾病预防控制中心 结核病预防控制中心                                                     | 任务来源  | 中美新发和再发传染病合作项目 |
| 所属专业          | 结核病学                                                                     | 课题负责人 | 王黎霞            |
| 审查方式          | <input type="checkbox"/> 书面审查; <input checked="" type="checkbox"/> 会议审查; | 日期    | 2011.8.12      |
| 主任委员          | 万利亚                                                                      | 副主任委员 | 何广学            |
| 评审委员          | 成诗明、端木宏谨、赵雁林、宋媛、邱凉、周林                                                    |       |                |
| 申请书的批件及编号     |                                                                          |       |                |
| 目前已获得的研究相关资料  | 项目实施方案、知情同意书和调查问卷                                                        |       |                |
| 课题负责人资格评价:    | 符合条件                                                                     |       |                |
| 设计方案评价:       | 设计合理                                                                     |       |                |
| 知情同意书及措施评价:   | 符合要求                                                                     |       |                |
| 提供医疗措施评价:     | 措施合理                                                                     |       |                |
| 受试者补偿/赔偿措施评价: | 有补偿措施                                                                    |       |                |
| 利益冲突评价:       | 无                                                                        |       |                |
| 委员名称          | 评审意见(同意、修改后再审或不同意)                                                       | 签名    | 日期             |
| 万利亚           | 同意                                                                       | 万利亚   | 2011.8.12      |
| 端木宏谨          | 同意                                                                       | 端木宏谨  | 2011.8.12      |
| 赵雁林           | 同意                                                                       | 赵雁林   | 2011.8.12      |
| 宋媛            | 同意                                                                       | 宋媛    | 2011.8.12      |
| 周林            | 同意                                                                       | 周林    | 2011.8.12      |

|     |              |     |           |
|-----|--------------|-----|-----------|
| 宋文培 | 北京理工大学公共管理学院 | 宋文培 | 2011.8.12 |
| 何行学 | 中国水协         | 何行学 | 2011.8.12 |
| 何行学 | 中国水协         | 何行学 | 2011.8.12 |
|     |              |     |           |
|     |              |     |           |

| 结论         | 评审意见      |
|------------|-----------|
| 1、批准       | 同意。       |
| 2、作必要修改后再审 |           |
| 3、不批准      |           |
| 主任委员签字:    | 何行学       |
| 副主任委员签字:   | 何行学       |
| 记录人签字:     | 熊真超       |
| 日期         | 2011.8.12 |

盖章: 伦理委员会

日期:
